# Supplementary material for: Human Stool Preservation Impacts Taxonomic Profiles in 16S Metagenomics Studies
Source: PubMed Central journal article supplement (PMC8860989; doi:10.3389/fcimb.2022.722886), 2022-02-08
Supplement: DataSheet_1_v1.pdf [file DataSheet_1_v1.pdf]

| <b>Genus</b>                  | <b>Proportion (%)</b> | <b>Gram</b> | <b>Oxygen status</b> |
|-------------------------------|-----------------------|-------------|----------------------|
| <i>Bacteroides</i>            | 18.51                 | NEG         | ANAER-ST             |
| <i>Faecalibacterium</i>       | 13.26                 | NEG         | ANAER-ST             |
| <i>Alistipes</i>              | 5.06                  | NEG         | ANAER-ST             |
| <i>Gemmiger</i>               | 4.34                  | NEG         | ANAER-ST             |
| <i>Blautia</i>                | 4.34                  | POS         | ANAER-ST             |
| <i>Prevotella</i>             | 3.86                  | NEG         | ANAER-ST             |
| <i>Ruminococcus</i>           | 3.62                  | POS         | ANAER-ST             |
| <i>Eubacterium</i>            | 3.07                  | POS         | ANAER-ST             |
| <i>Ruminiclostridium</i>      | 2.84                  | POS         | ANAER-ST             |
| <i>Bifidobacterium</i>        | 2.68                  | POS         | ANAER-ST             |
| <i>Dialister</i>              | 2.36                  | NEG         | ANAER-ST             |
| <i>Parabacteroides</i>        | 2.35                  | NEG         | ANAER-ST             |
| <i>Oscillibacter</i>          | 2.11                  | NEG         | ANAER-ST             |
| <i>Phascolarctobacterium</i>  | 1.68                  | NEG         | ANAER-ST             |
| <i>Roseburia</i>              | 1.44                  | VAR         | ANAER-ST             |
| <i>Succiniclasticum</i>       | 1.37                  | NEG         | ANAER-ST             |
| <i>Streptococcus</i>          | 1.16                  | POS         | FAC                  |
| <i>Cellulosilyticum</i>       | 1.14                  | VAR         | ANAER-ST             |
| <i>Lactobacillus</i>          | 1.13                  | POS         | FAC                  |
| <i>Megamonas</i>              | 1.09                  | VAR         | ANAER-ST             |
| <i>Fusicatenibacter</i>       | 1.05                  | POS         | ANAER-ST             |
| <i>Barnesiella</i>            | 1.03                  | NEG         | ANAER-ST             |
| <i>Anaerotignum</i>           | 1.00                  | POS         | ANAER-ST             |
| <i>Herbivorax</i>             | 0.93                  | POS         | ANAER-ST             |
| <i>Coprococcus</i>            | 0.83                  | POS         | ANAER-ST             |
| <i>Akkermansia</i>            | 0.77                  | NEG         | ANAER-ST             |
| <i>Butyricimonas</i>          | 0.74                  | NEG         | ANAER-ST             |
| <i>Fodinicurvata</i>          | 0.69                  | NEG         | FAC                  |
| <i>Lachnoclostridium</i>      | 0.67                  | POS         | ANAER-ST             |
| <i>Lachnospira</i>            | 0.66                  | POS         | ANAER-ST             |
| <i>Sutterella</i>             | 0.66                  | NEG         | MICRO-AE             |
| <i>Anaerostipes</i>           | 0.61                  | POS         | ANAER-ST             |
| <i>Aestuariuspira</i>         | 0.6                   | NEG         | AER-ST               |
| <i>Dorea</i>                  | 0.57                  | POS         | ANAER-ST             |
| <i>Neglecta</i>               | 0.55                  | POS         | ANAER-ST             |
| <i>Parasutterella</i>         | 0.53                  | NEG         | ANAER-ST             |
| <i>Clostridium</i>            | 0.53                  | POS         | ANAER-ST             |
| <i>Sporobacter</i>            | 0.52                  | POS         | ANAER-ST             |
| <i>Odoribacter</i>            | 0.48                  | NEG         | ANAER-ST             |
| <i>Erysipelatoclostridium</i> | 0.47                  | POS         | ANAER-ST             |
| <i>Dethiosulfatibacter</i>    | 0.47                  | NEG         | ANAER-ST             |
| <i>Romboutsia</i>             | 0.46                  | VAR         | ANAER-ST             |
| <i>Desulfovibrio</i>          | 0.44                  | NEG         | ANAER-ST             |
| <i>Collinsella</i>            | 0.41                  | POS         | ANAER-ST             |
| <i>Acidaminococcus</i>        | 0.39                  | NEG         | ANAER-ST             |
| <i>Fastidiosipila</i>         | 0.31                  | POS         | MICRO-AE             |
| <i>Oribacterium</i>           | 0.3                   | POS         | ANAER-ST             |
| <i>Catenibacterium</i>        | 0.29                  | POS         | ANAER-ST             |
| <i>Magaeibacillus</i>         | 0.27                  | POS         | ANAER-ST             |
| <i>Intestinimonas</i>         | 0.27                  | POS         | ANAER-ST             |
